# Supplementary material
Source: PubMed Central journal article supplement (PMC7566887)
Supplement: NIHMS1626356-supplement-Suppl_Figure_4.pdf [file NIHMS1626356-supplement-Suppl_Figure_4.pdf]

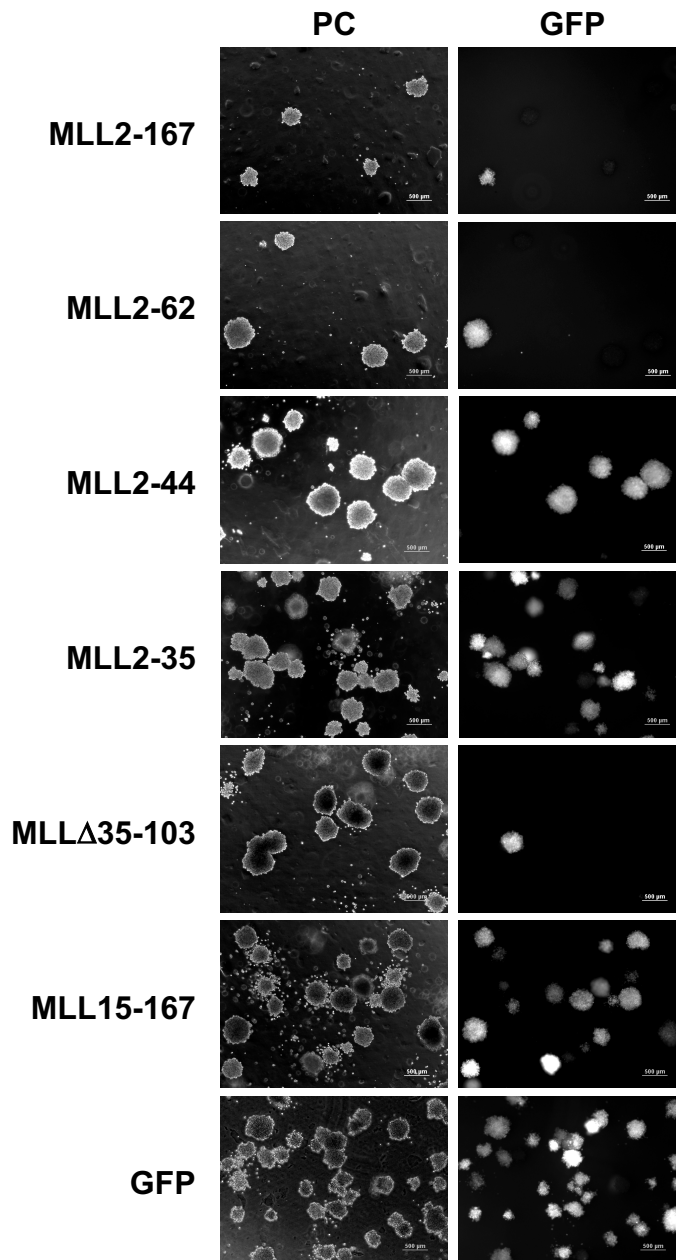

*Caslini et al.*, **Figure S 4**

Transduction of MLL fragments with high menin binding avidity inhibits cell growth. MLL-AF9 transformed bone marrow cells obtained from third round passage in methylcellulose (MC) were spin-infected with MSCV-GFP empty vector or MSCV-GFP vectors encoding for MLL deletion mutants. The GFP positive cells were flow sorted and 4 days later plated in MC at  $2 \times 10^4$  cells per plate for 4 days. MLL-AF9-transformed cells transduced with MLL fragments with high menin-binding avidity (MLL 2-167, MLL 2-62 or MLL  $\Delta$ 35-103) show an overall reduced number of colonies with very low fraction of GFP-positives compared to MSCV- GFP empty vector or MLL fragments with weak or no interaction with menin (MLL 2-35, MLL 15-167), which is indicative of cell growth inhibition with rapid downregulation of GFP expression and out competition by GFP negative cells. In MLL 2-44 transduced cells, despite of an elevated percentage of GFP-positives, the overall number of colonies is low indicating a reduced but effective growth inhibition.
