# Supplementary material
Source: PubMed Central journal article supplement (PMC7566887)
Supplement: NIHMS1626356-supplement-Suppl_Figure_5.pdf [file NIHMS1626356-supplement-Suppl_Figure_5.pdf]

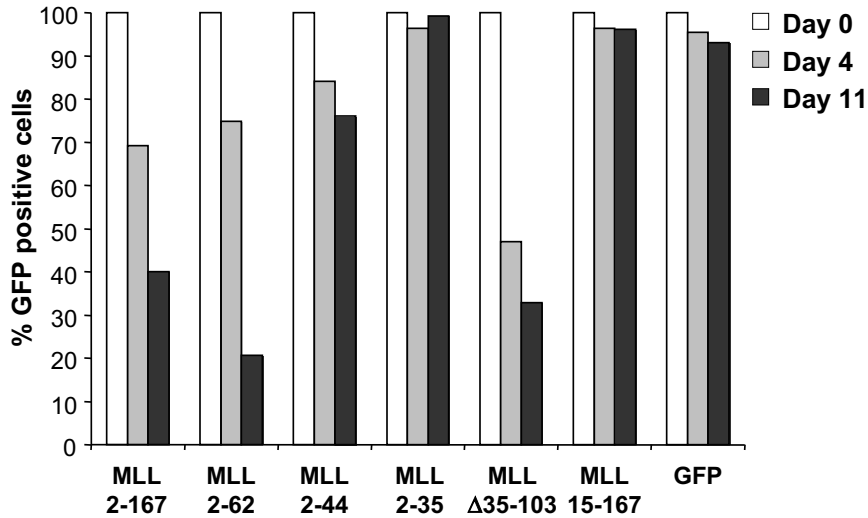

*Caslini et al.*, **Figure S 5**

Flow cytometric analysis for GFP signals of MLL-AF9 transformed, MLL fragment transduced BM cells at 4 and 11 days post GFP sorting. MLL-AF9 transformed BM cells obtained from third round passage in methylcellulose (MC) were spin-infected with MSCV-GFP empty vector or MSCV-GFP vectors encoding for MLL deletion mutants. The GFP positive cells were flow sorted and 4 and 11 days later analyzed by flow sorting-based GFP expression profiling. Expression of GFP is rapidly downregulated or out competed by GFP negative cells in MLL2-167, MLL2-62 or MLL  $\Delta$ 35-103 and only moderately affected in MLL2-44. In contrast, equally high and stable percentages of GFP positive cells are seen within all the remaining transductions.
